# Supplementary material for: Analyzing the innate immunity of NIH hairless mice and the impact of gut microbial polymorphisms on Listeria monocytogenes infection
Source: PubMed Central journal article supplement (PMC5739728; doi:10.18632/oncotarget.22051), 2017-10-25
Supplement: oncotarget-08-106222-s001.pdf [file oncotarget-08-106222-s001.pdf]

# Analyzing the innate immunity of NIH hairless mice and the impact of gut microbial polymorphisms on *Listeria monocytogenes* infection

## SUPPLEMENTARY MATERIALS

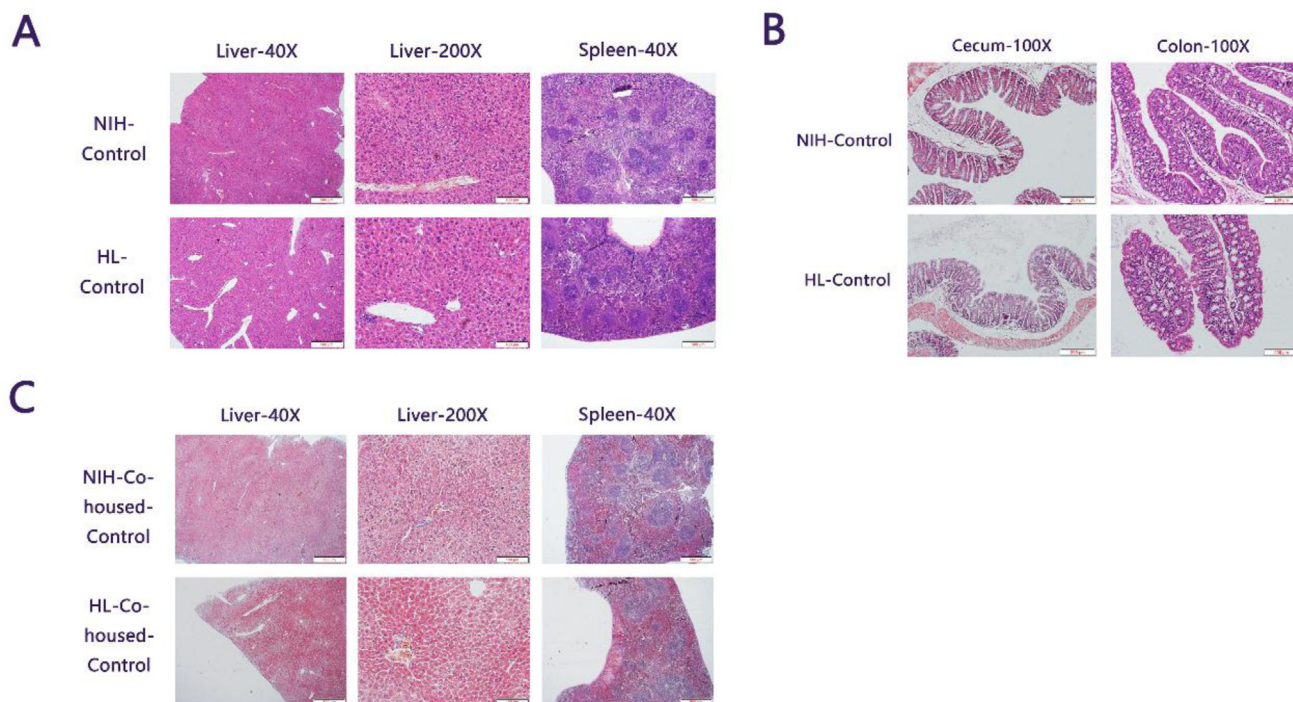

**Supplementary Figure 1:** (A) In NIH and HL mice, the liver and spleen were normal in morphology and structure, no inflammatory cell infiltration was found in the liver and the boundaries between red pulp and white pulp were obvious. (B) In HL-Co-housed and NIH-Co-housed mice, the liver and spleen were normal in morphology and structure, no inflammatory cell infiltration was found in the liver and the boundaries between red pulp and white pulp were obvious. (C) The morphology of cecum and colon in NIH and HL mice.

**Supplementary Table 1: Sample sequence data.** See Supplementary\_Table\_1

**Supplementary Table 2: LDA value list.** See Supplementary\_Table\_2

**Supplementary Table 3: Raw data.** See Supplementary\_Table\_3
